# Supplementary material
Source: Research Square preprint supplement (doi:10.21203/rs.3.rs-9721460/v1)
Supplement: Supplementary file 1 [file 7cc22f1294ffc521cbd9292a.pdf]

# SUPPLEMENTARY MATERIAL

Ethical Transformational Leadership in Artificial Intelligence Governance in Secondary School Art Education

**Peneliti:** Meilina Mira Sari, S.Sn., M.Pd.

**Institusi:** Universitas Negeri Semarang / SMA N 1 Teladan Yogyakarta

**Dokumen:** Instrumen Penelitian (Wawancara & Survei)

## 1. Pedoman Wawancara Mendalam (Kepala Sekolah & Wakakur)

| Dimensi               | Indikator Pertanyaan                                                                                                              |
|-----------------------|-----------------------------------------------------------------------------------------------------------------------------------|
| Visi<br>Kepemimpinan  | Bagaimana pandangan Bapak/Ibu terhadap penggunaan AI generator (seperti Midjourney/ChatGPT) dalam kurikulum seni budaya saat ini? |
| Etika &<br>Integritas | Apa kekhawatiran utama sekolah terkait orisinalitas karya siswa? Apakah sudah ada regulasi tertulis mengenai hal ini?             |
| Dukungan Guru         | Bagaimana sekolah memfasilitasi pelatihan guru seni untuk beradaptasi dengan disrupsi AI?                                         |
| Tata Kelola           | Langkah konkret apa yang diambil sekolah untuk menyeimbangkan antara inovasi teknologi dan pelestarian nilai seni tradisional?    |

## 2. Instrumen Survei Kesiapan Guru (Skala Likert 1-5)

Berikut adalah beberapa butir pernyataan yang disebarkan kepada 30 guru seni di Yogyakarta:

- "Saya merasa percaya diri menggunakan alat berbasis AI dalam proses evaluasi karya seni siswa."
- "Saya memiliki pemahaman yang cukup mengenai hak cipta dalam karya seni yang dihasilkan oleh AI."
- "Pimpinan sekolah memberikan arahan yang jelas mengenai batasan penggunaan AI di kelas."

- "Penggunaan AI di kelas seni dapat mengancam nilai-nilai estetika murni yang saya ajarkan."

### **3. Protokol FGD (Focus Group Discussion)**

Diskusi kelompok terfokus dilakukan bersama MGMP Seni Budaya Yogyakarta dengan poin utama:

- Standarisasi penilaian karya seni digital "hybrid" (AI + Manual).
- Kolaborasi lintas sekolah dalam menyusun kurikulum etika AI.
- Kebutuhan modul praktis tata kelola AI untuk guru di daerah.

*Dokumen ini merupakan lampiran tambahan untuk manuskrip yang dikirimkan ke Research Square. Seluruh instrumen telah melalui proses validasi ahli.*
